# Supplementary material for: Chronic conditions and use of health care service among German centenarians
Source: Oxford University Press journal article supplement (doi:10.1093/ageing/afx008), 2017-01-30
Supplement: afx008_Appendix.pdf [file afx008_Appendix.pdf]

## Charlson comorbidity index coding algorithm and Priscus consensus list

Look-back window: 5 years (2009-2013)

Data base: Health insurance data from AOK Nordost (statutory health insurance company)

| Diagnostic category                                                              | ICD-10-2013, German Version                                                                                                                                                    | assigned weight |
|----------------------------------------------------------------------------------|--------------------------------------------------------------------------------------------------------------------------------------------------------------------------------|-----------------|
| Cerebrovascular disease                                                          | G45.x, G46.x, H34.0, H34.1, I60.x-I69.x                                                                                                                                        | 1               |
| Congestive heart failure                                                         | I09.9, I11.0, I13.0, I13.2, I25.5, I42.0, I42.5-I42.9, I43.x                                                                                                                   | 1               |
| Chronic pulmonary disease                                                        | I27.8, I27.9, J41.0 -J47.x, J60.x-J67.x, J68.4, J70.1, J70.3                                                                                                                   | 1               |
| Dementia                                                                         | F00.x-F03.x, F05.1, F06.5, F06.6, F06.8, F06.9, F09, G30.x-G31.1, R54                                                                                                          | 1               |
| Diabetes without organ damage                                                    | E10.0, E10.1, E10.6, E10.8, E10.9, E11.0, E 11.1, E11.6, E11.8, E11.9, E12.0, E12.1, E12.6, E12.8, E12.9, E13.0, E13.1, E13.6, E13.8, E13.9, E14.0, E14.1, E14.6, E14.8, E14.9 | 1               |
| Mild liver disease                                                               | B18.x, K70.0-K70.3, K71.3-K71.5, K71.7, K73.x, K74.x, K76.0, K76.2-K76.4, K76.8, K76.9, Z94.4                                                                                  | 1               |
| Former myocardial infarction                                                     | I21.x, I22.x, I25.2                                                                                                                                                            | 1               |
| Peripheral vascular disease                                                      | I70.x-I71.x, I73.1, I73.8, I73.9, I77.1, I79.0, I79.2, K55.1, K55.8, K55.9, Z95.8, Z95.9                                                                                       | 1               |
| Peptic ulcer disease                                                             | K25.x-K28.x                                                                                                                                                                    | 1               |
| Rheumatic disease/arthritis                                                      | M05.x, M06.x, M10.x, M11.x-M14.x, M15.x-M19.x, M20.x-M24.x, M31.5, M32.x-M34.x, M35.1, M35.3, M36                                                                              | 1               |
| Diabetes with organ damage                                                       | E10.2-E10.7, E11.2-E11.8, E12.2-E12.7, E13.2-E13.7,                                                                                                                            | 2               |
| Hemiplegia or paraplegia                                                         | G04.1, G11.4, G80.1, G80.2, G81.x, G82.x, G83.0-G83.4, G83.9                                                                                                                   | 2               |
| Any malignancy including lymphoma or leukemia, except malignant neoplasm of skin | C00.x-C26.x, C30.x-C34.x, C37.x-C41.x, C43.x, C45.x-C58.x, C60.x-C76.x, C80.0, C80.9, C81.x-C86.6, C88.x, C90.x-C97.x                                                          | 2               |
| AIDS                                                                             | B20.x- B23.x, B24.x                                                                                                                                                            | 6               |
| Metastatic solid tumor                                                           | C77.x-C79.x                                                                                                                                                                    | 6               |
| Moderate or severe liver disease                                                 | I85, I85.0, I85.9, K70.4, K71.1, K72.1, K72.9, K76.5, K76.6, K76.7                                                                                                             | 3               |
| renal disease                                                                    | I12.0, I13.1, N03.2- N03.7, N05.2-N05.7, N18.x, Z49.0-Z49.2, Z94.0, Z99.2                                                                                                      | 2               |

| <b>Priscus List of PIM</b>                                                                                                                          | <b>ATC -Code</b>                                                                                                                  |  |
|-----------------------------------------------------------------------------------------------------------------------------------------------------|-----------------------------------------------------------------------------------------------------------------------------------|--|
| N05: Psychleptics /N04A:<br>Antipsychotics                                                                                                          | N05AA02, N05AB02, N05AB03, N05AC02, N05AD01,<br>N05AH02, N05AH03                                                                  |  |
| N05B: Anxiolytics / N05BA,<br>N05CD: Benzodiazepines (long<br>acting)                                                                               | N05BA01, N05BA02, N05BA03, N05BA05, N05BA08,<br>N05BA09, N05BA11, N05CD01, N05CD02, N05CD03                                       |  |
| N05B: Anxiolytics / N05BA,<br>N05CD, N05CF: Benzodiazepines<br>(short acting)                                                                       | N05BA04, N05BA06, N05BA07, N05BB01, N05CD05,<br>N05CD06, N05CD07, N05CD09, N05CF01, N05CF02, N05CF03                              |  |
| N05: Psychleptics / N05C :<br>Sedatives                                                                                                             | N05CC01, N05CM20, N05CM21                                                                                                         |  |
| N06: Psychoanaleptics / N06A:<br>Antidepressants                                                                                                    | N06AA02, N06AA04, N06AA06, N06AA09, N06AA12,<br>N06AA21, N06AB03, N06AF04                                                         |  |
| N02:Analgesic drugs /M01: anti-<br>inflammatory and antirheumatic<br>deugs Antiphlogistics /<br>M02:topical products for joint and<br>muscular pain | M02AA23, M02AA01, M01AB11, M01AE53, M01AC01,<br>M01AC06, M01AH05, N02AB02                                                         |  |
| R06A: Antihistamines for systemic<br>use                                                                                                            | R06AX07, R06AB03, R06AB04, R06AA04,                                                                                               |  |
| C01:cardiac therapy/ C01A:<br>Cardiac glykosides/C01B:<br>antiarrhythmic drugs/C07: Beta<br>blocking drugs                                          | C01AA02, C01AA05, C01AA08, C01AA55, C01AA58, C01BA01,<br>C01BC04, C07AA07                                                         |  |
| C02: Antihypertensive drugs/C08:<br>Calcium channel blockers                                                                                        | C02CA04, C02LE01, C02CA08, C02AC01, C02LA01, C02AB01,<br>C02AB02, C08CA05                                                         |  |
| Dementia drugs /C04: peripheral<br>vasodilators, N06B:<br>Psychostimulants                                                                          | C04AD03, C04AE02, C04AX21, N06BX03                                                                                                |  |
| <b>Preventive drugs</b>                                                                                                                             |                                                                                                                                   |  |
| Biphosphonates                                                                                                                                      | M05BA01, M05BA02, M05BA03 M05BA04, M05BA05,<br>M05BA06, M05BA07, M05BA08, M05BB01, M05BB02,<br>M05BB03, M05BB04, M05BB05, M05BB06 |  |
| Statins                                                                                                                                             | C10AA01, C10AA02, C10AA03, C10AA04, C10AA05, C10AA06,<br>C10AA07, C10AA08                                                         |  |
